# Supplementary material for: New Mononuclear and Binuclear Cu(II), Co(II), Ni(II), and Zn(II) Thiosemicarbazone Complexes with Potential Biological Activity: Antimicrobial and Molecular Docking Study
Source: MDPI journal article supplement (doi:10.3390/molecules26082288), 2021-04-15
Supplement: s1 [file s1]

# New Mononuclear and Binuclear Cu(II), Co(II), Ni(II), and Zn(II) Thiosemicarbazone Complexes with Potential Biological Activity: Antimicrobial and Molecular Docking Study

Ahmed Gaber <sup>1,2</sup>, Moamen S. Refat <sup>3,\*</sup>, Arafa A.M. Belal <sup>4</sup>, Ibrahim M. El-Deen <sup>4</sup>, Nader Hassan <sup>4</sup>, Rozan Zakaria <sup>4</sup>, Majid Alhomrani <sup>2,5</sup>, Abdulhakeem S. Alamri <sup>2,5</sup>, Walaa F. Alsanie <sup>2,5</sup> and Essa M. Saied <sup>6,7</sup>

<sup>1</sup> Department of Biology, College of Science, Taif University, P.O. Box 11099, Taif 21944, Saudi Arabia

<sup>2</sup> Center of Biomedical Sciences Research, Taif University, P.O. Box 11099, Taif 21944, Saudi Arabia

<sup>3</sup> Department of Chemistry, College of Science, Taif University, P.O. Box 11099, Taif 21944, Saudi Arabia

<sup>4</sup> Department of Chemistry, Faculty of Science, Port Said University, Port Said 42511, Egypt

<sup>5</sup> Department of Clinical Laboratory Sciences, College of Applied Medical Sciences, Taif University, P.O. Box 11099, Taif 21944, Saudi Arabia

<sup>6</sup> Chemistry Department, Faculty of Science, Suez Canal University, P.O. Box 41522, Ismailia 42524, Egypt

<sup>7</sup> Institute for Chemistry, Humboldt Universität zu Berlin, Brook-Taylor-Str. 2, 12489 Berlin, Germany

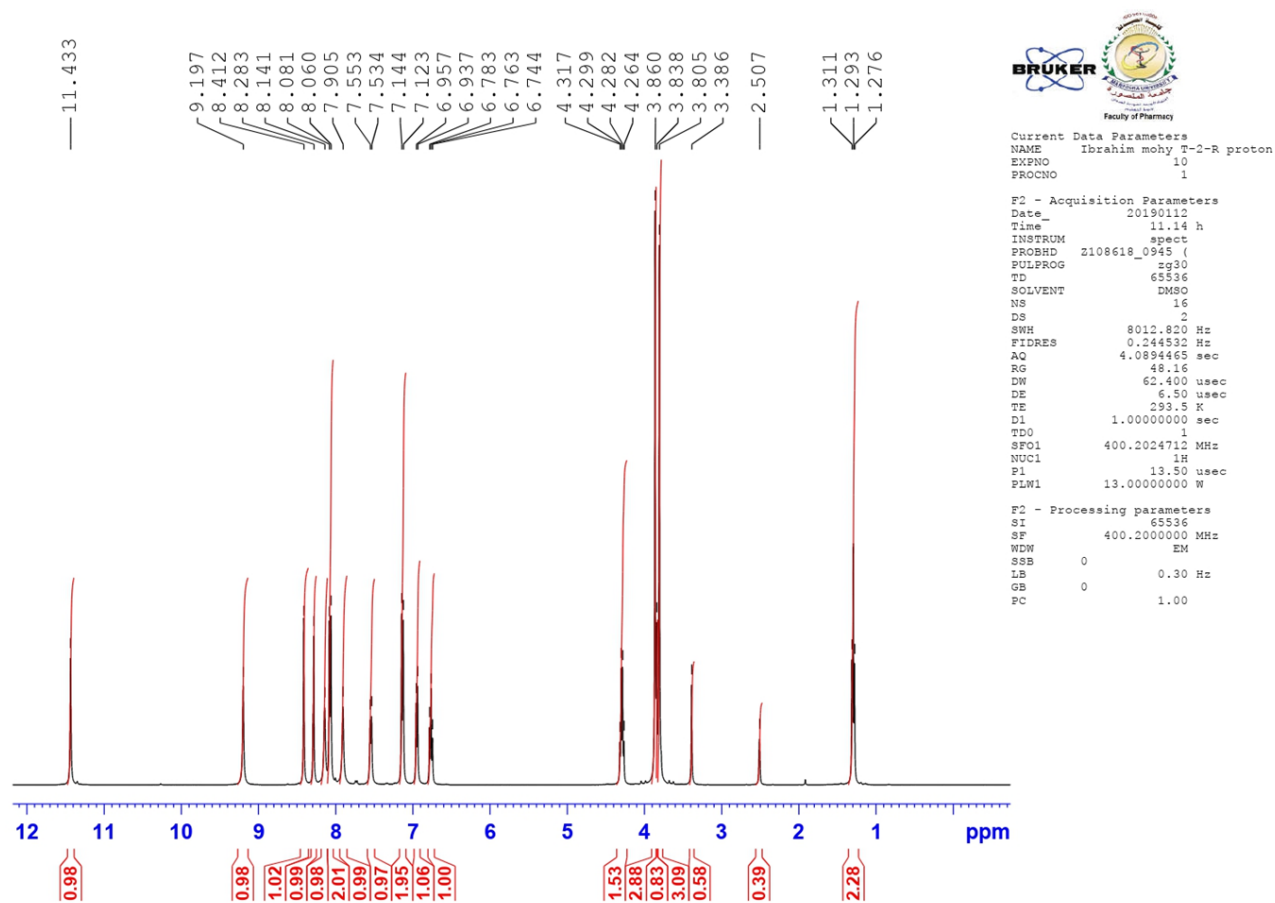

**Figure S1:**  $^1\text{H}$ -NMR spectrum of the MTSC ligand in DMSO- $\text{d}_6$  solvent.

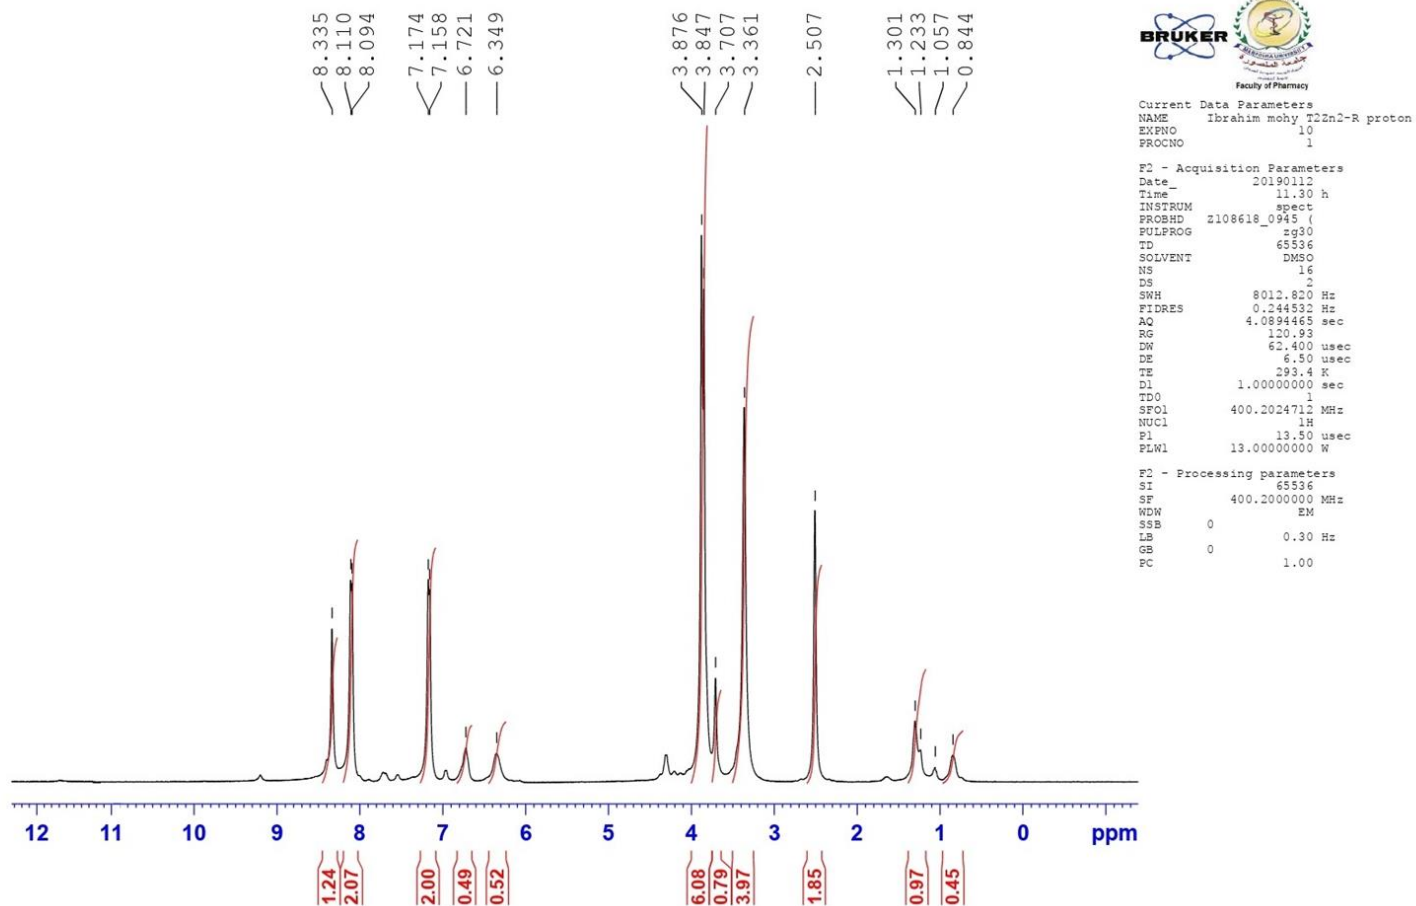

**Figure S2:**  $^1\text{H}$ -NMR spectrum of the  $[\text{Zn}(\text{MTSC})(\text{NH}_3)(\text{Cl})].3\text{H}_2\text{O}$  (**14**) in  $\text{DMSO}-d_6$  solvent.

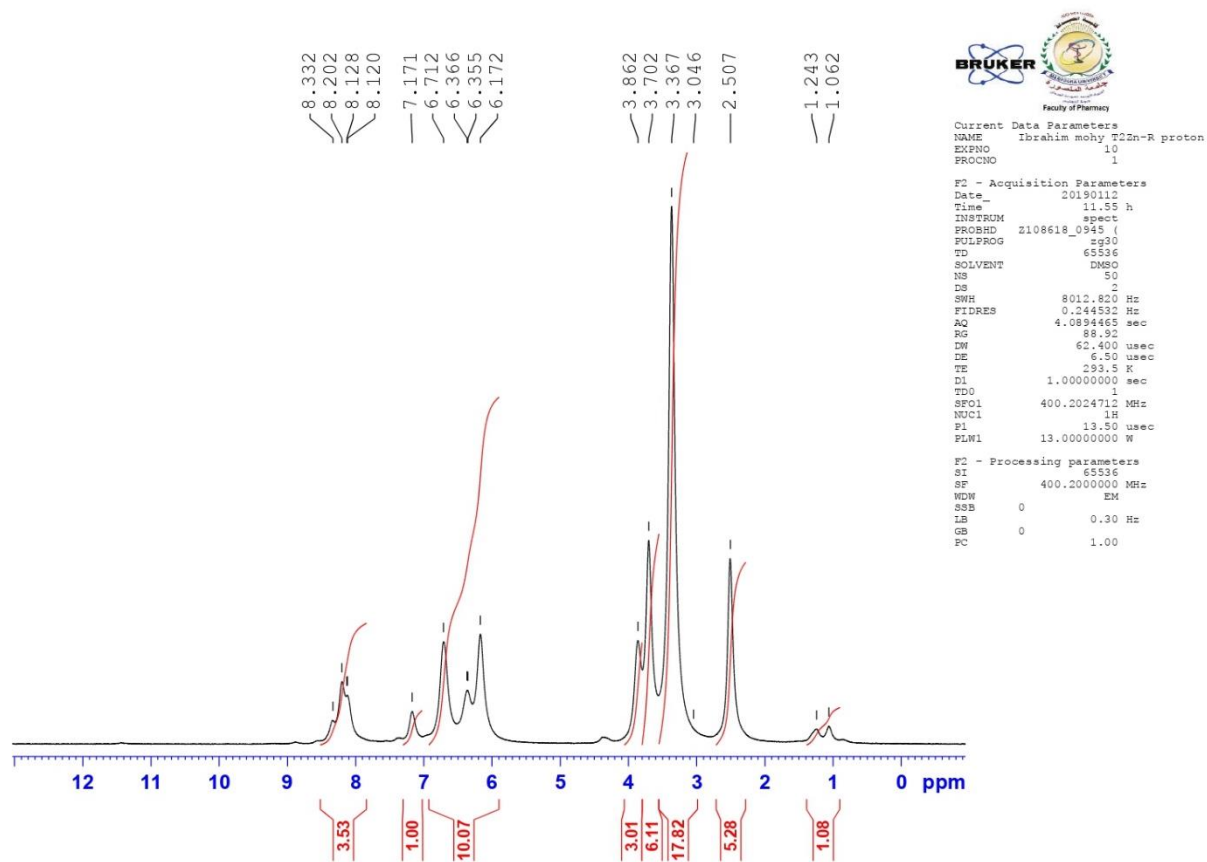

**Figure S3:**  $^1\text{H}$ -NMR spectrum of the  $[\text{Zn}_2(\text{MTSC})(\text{NH}_3)_3(\text{Cl})_2] \cdot 2\text{H}_2\text{O}$  (**15**) in  $\text{DMSO}-d_6$  solvent.

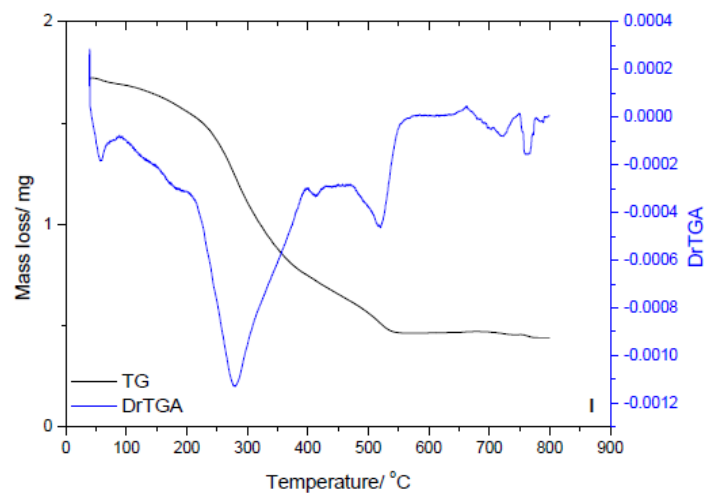

(a)

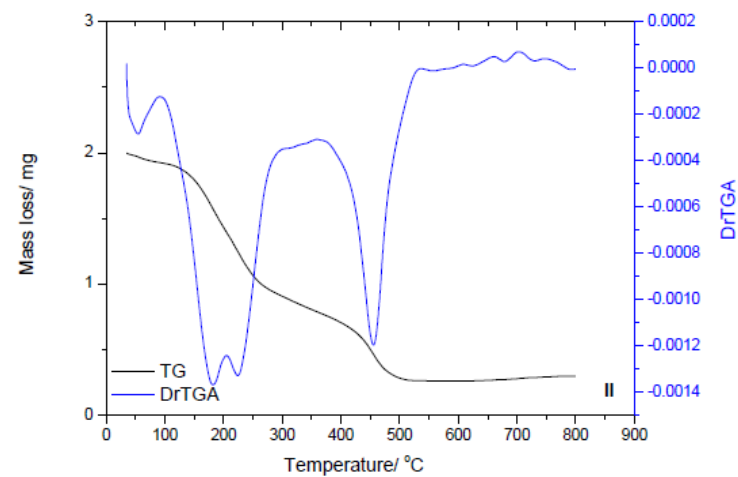

(b)

**Figure S4:** TG curves of Co(II) complexes **8** (a) and **9** (b).

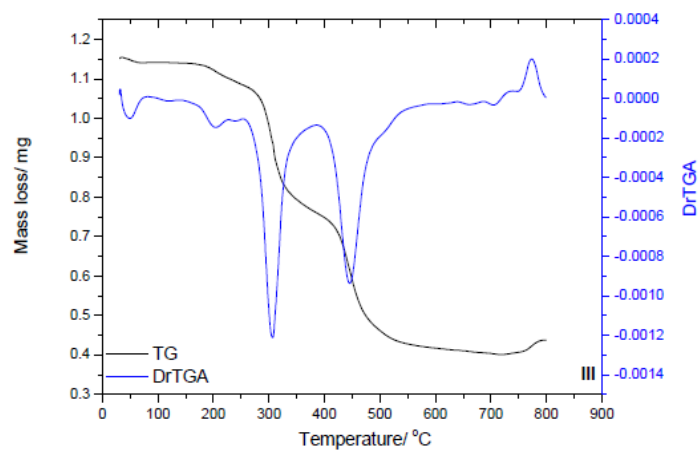

(a)

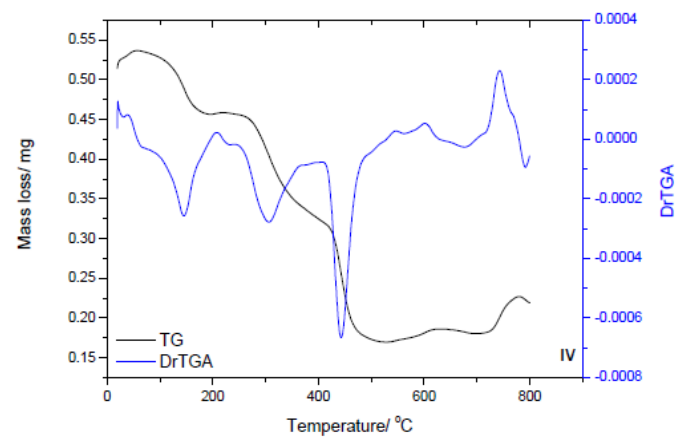

(b)

**Figure S5:** TG curves of Ni(II) complexes **10** (a) and **11** (b).

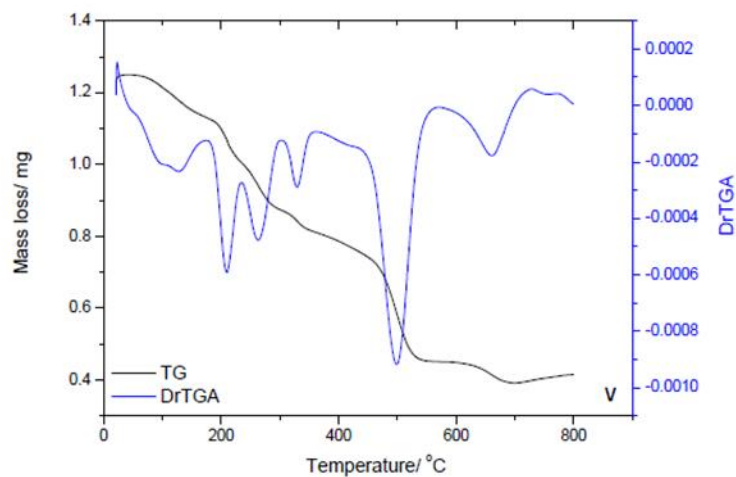

(a)

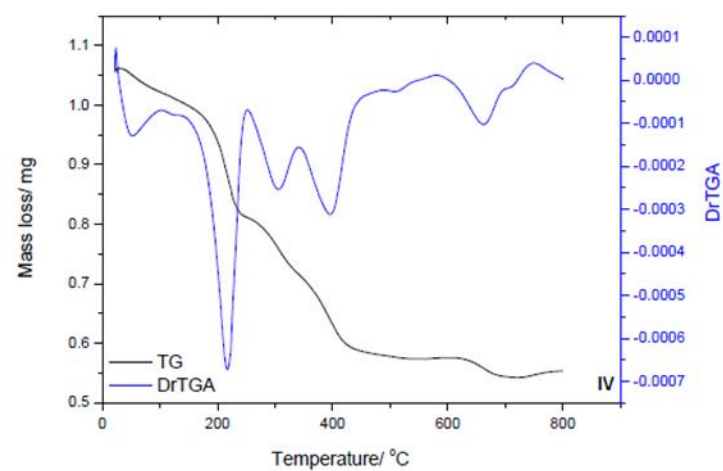

(b)

**Figure S6:** TG curves of Cu(II) complexes **12** (a) and **13** (b).

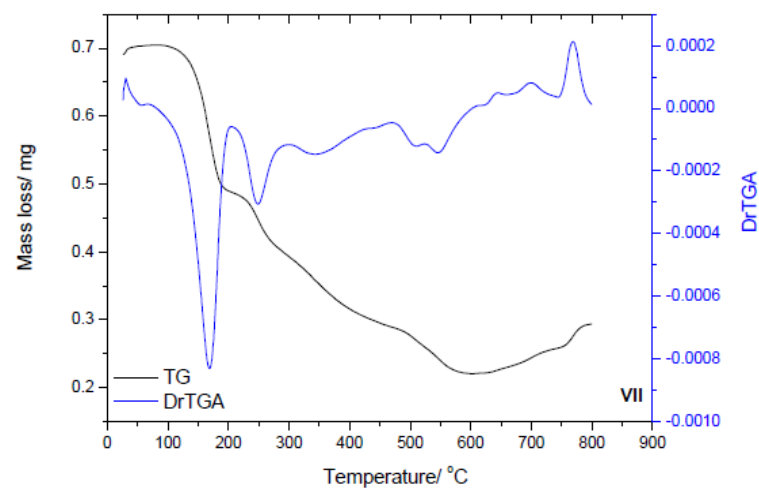

(a)

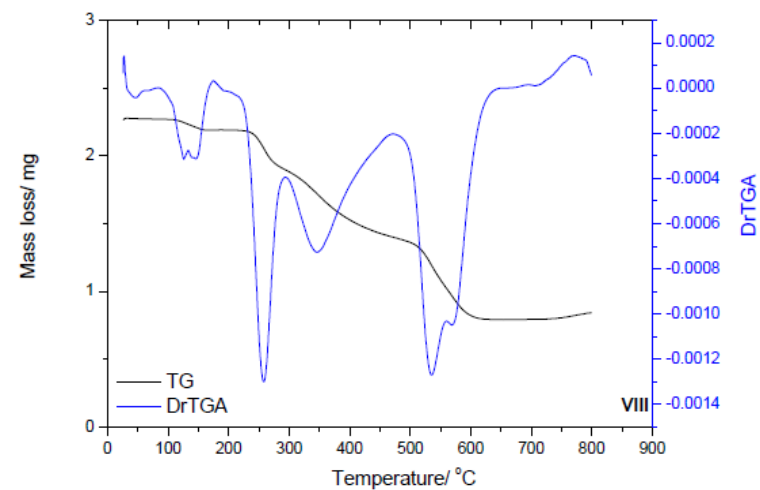

(b)

**Figure S7:** TG curves of Zn(II) complexes **14** (a) and **15** (b).
